# Supplementary material for: Regulation of the EphA2 receptor intracellular region by phosphomimetic negative charges in the kinase-SAM linker
Source: PubMed Central journal article supplement (PMC8639986; doi:10.1038/s41467-021-27343-z), 2021-12-02
Supplement: 41467_2021_27343_MOESM1_ESM.pdf [file 41467_2021_27343_MOESM1_ESM.pdf]

## Supplementary Information

### **Regulation of the EphA2 Receptor Intracellular Region by Phosphomimetic Negative Charges in the Kinase-SAM Linker**

Bernhard C. Lechtenberg<sup>1,2,3\*</sup>, Marina P. Gehring<sup>1</sup>, Taylor P. Light<sup>4</sup>, Christopher R. Horne<sup>2,3</sup>,  
Mike W. Matsumoto<sup>1</sup>, Kalina Hristova<sup>4</sup> and Elena B. Pasquale<sup>1\*</sup>

<sup>1</sup> Cancer Center, Sanford Burnham Prebys Medical Discovery Institute, La Jolla CA 92037, USA

<sup>2</sup> Ubiquitin Signalling Division, The Walter and Eliza Hall Institute of Medical Research, Parkville, Victoria 3052, Australia

<sup>3</sup> Department of Medical Biology, The University of Melbourne, Parkville, Victoria 3010, Australia

<sup>4</sup> Department of Materials Science and Engineering, Institute for NanoBioTechnology, Johns Hopkins University, 3400 Charles Street, Baltimore, MD 21218

\* Correspondence: [lechtenberg.b@wehi.edu.au](mailto:lechtenberg.b@wehi.edu.au) and [elenap@sbpdiscovery.org](mailto:elenap@sbpdiscovery.org)

**Supplementary Table 1. Data collection and refinement statistics**

|                                                      | EphA2 WT                    | EphA2 S897E/S901E         | EphA2 S901E                   |
|------------------------------------------------------|-----------------------------|---------------------------|-------------------------------|
| <b>Data collection</b>                               |                             |                           |                               |
| Space group                                          | I 1 2 1                     | P 3 <sub>2</sub> 2 1      | I 1 2 1                       |
| Cell dimensions<br><i>a, b, c</i> (Å)                | 123.1, 55.0, 135.7          | 94.5, 94.5, 99.7          | 121.6, 54.6,<br>135.5         |
| $\alpha, \beta, \gamma$ (°)                          | 90, 94.86, 90               | 90, 90, 120               | 90, 95.2, 90                  |
| Resolution (Å)                                       | 20.49–1.75(1.78–<br>1.75) * | 29.53–2.80(2.95–<br>2.80) | 29.25–<br>2.30(2.38–<br>2.30) |
| <i>R</i> <sub>sym</sub> or <i>R</i> <sub>merge</sub> | 0.059(0.690)                | 0.285(1.956)              | 0.089(0.656)                  |
| <i>I</i> / $\sigma I$                                | 13.4(1.4)                   | 10.2(1.4)                 | 12.0(1.8)                     |
| Completeness (%)                                     | 99.9(100.0)                 | 99.9(100.0)               | 99.8(99.8)                    |
| Redundancy                                           | 3.6(3.5)                    | 10.9(11.0)                | 3.7(3.7)                      |
| <b>Refinement</b>                                    |                             |                           |                               |
| Resolution (Å)                                       | 20.48–1.75(1.81–<br>1.75)   | 29.53–2.80<br>(2.90–2.80) | 29.25–<br>2.30(2.38–<br>2.30) |
| No. reflections                                      | 90866 (9053)                | 13027 (1269)              | 39703 (3948)                  |
| <i>R</i> <sub>work</sub> / <i>R</i> <sub>free</sub>  | 0.1883/0.2173               | 0.1976/0.2461             | 0.1884/0.2257                 |
| No. atoms                                            | 6472                        | 2913                      | 6277                          |
| Protein                                              | 5764                        | 2882                      | 5847                          |
| Ligand/ion                                           | 62                          | 1                         | 62                            |
| Water/solvent                                        | 646                         | 30                        | 368                           |
| <i>B</i> -factors                                    |                             |                           |                               |
| Protein                                              | 32.3                        | 56.8                      | 42.9                          |
| Ligand/ion                                           | 41.9                        | 121.1                     | 51.5                          |
| Water/solvent                                        | 35.1                        | 36.9                      | 38.9                          |
| R.m.s. deviations                                    |                             |                           |                               |
| Bond lengths (Å)                                     | 0.004                       | 0.003                     | 0.002                         |
| Bond angles (°)                                      | 0.71                        | 0.50                      | 0.52                          |

Data for each structure were collected from a single crystal.

\*Values in parentheses are for highest-resolution shell.

**Supplementary Table 2: SAXS data collection and analysis statistics**

| <b>Data collection parameters</b>                  |                                                   |                |                |                |                |
|----------------------------------------------------|---------------------------------------------------|----------------|----------------|----------------|----------------|
| Instrument                                         | Australian Synchrotron SAXS/WAXS<br>beamline      |                |                |                |                |
| Detector                                           | PILATUS3-2M (Dectris)                             |                |                |                |                |
| Detector distance (m)                              | 3                                                 |                |                |                |                |
| Wavelength (Å)                                     | 1.0332                                            |                |                |                |                |
| Total $q$ range (Å <sup>-1</sup> )                 | 0.005 – 0.5                                       |                |                |                |                |
| Maximum flux at sample                             | 8 x 10 <sup>12</sup> photons per second at 12 keV |                |                |                |                |
| Exposure time                                      | Continuous 1 second frame measurements            |                |                |                |                |
| Sample configuration                               | SEC-SAXS with co-flow                             |                |                |                |                |
| Temperature                                        | 12                                                |                |                |                |                |
| <b>Software employed</b>                           |                                                   |                |                |                |                |
| Primary data reduction                             | ScatterBrain (Australian Synchrotron)             |                |                |                |                |
| Data processing                                    | PRIMUS (ATSAS)                                    |                |                |                |                |
| <b>Analysis statistics</b>                         | <b>WT</b>                                         | <b>S892E</b>   | <b>S897E</b>   | <b>3E</b>      | <b>5E</b>      |
| $I(0)$ (cm <sup>-1</sup> ) (from Guinier analysis) | 0.026 ± 9.8e-5                                    | 0.027 ± 1.4e-4 | 0.026 ± 1.0e-4 | 0.027 ± 1.3e-4 | 0.029 ± 1.5e-4 |
| $R_g$ (Å) (from Guinier analysis)                  | 25.87 ± 0.16                                      | 28.04 ± 0.25   | 26.35 ± 0.17   | 27.29 ± 0.23   | 31.57 ± 0.25   |
| $R_g$ (Å) (from $P(r)$ analysis)                   | 26.49 ± 0.03                                      | 28.99 ± 0.03   | 27.13 ± 0.03   | 28.10 ± 0.03   | 32.84 ± 0.03   |
| $D_{max}$ (Å)                                      | 104                                               | 116            | 104            | 104            | 123            |
| Porod volume estimate (Å <sup>3</sup> )            | 65327                                             | 69929          | 65852          | 69060          | 81873          |
| <b>Molecular mass (MM) determination</b>           |                                                   |                |                |                |                |
| MM (from Porod Volume, kDa)                        | 38.4                                              | 41.1           | 38.7           | 40.6           | 48.2           |
| MM (from SAXSMoW2*, $q_m = 8/R_g$ , kDa)           | 47.6                                              | 53.6           | 48.9           | 51.1           | 65.4           |
| Calculated monomer MM from sequence (kDa)          | 47.2                                              | 47.2           | 47.2           | 47.2           | 47.2           |

\*<http://saxs.ifsc.usp.br/>

**Supplementary Table 3. Kinase phosphorylation of EphA2 linker peptide with pS897**

| Protein Kinase  | CPM     | Protein Kinase  | CPM    | Protein Kinase   | CPM   | Protein Kinase  | CPM   | > 100,000       |
|-----------------|---------|-----------------|--------|------------------|-------|-----------------|-------|-----------------|
| PKC zeta        | 192,007 | PDK1            | 10,417 | MEKK2            | 4,367 | MARK1           | 2,197 | 50,000 - 99,999 |
| PAK3            | 151,679 | CAMKK1          | 10,287 | CK2 alpha 2      | 4,254 | MNK1            | 2,187 | 25,000 - 49,999 |
| CK1 gamma 1     | 139,024 | AMPK (A1/B2/G2) | 10,227 | MLK4             | 4,176 | MEKK6           | 2,178 | 10,000 - 24,999 |
| NEK7            | 119,908 | ZAK             | 10,208 | GSK3 alpha       | 4,094 | STK21(CIT)      | 2,124 |                 |
| PKC beta I      | 115,018 | NUAK1           | 10,059 | CLK1             | 4,068 | TAK1-TAB1       | 2,080 |                 |
| PKC beta II     | 111,980 | ALK6 (BMPR1B)   | 10,006 | HIPK3            | 4,009 | ERK5            | 2,063 |                 |
| PKC gamma       | 108,805 | TSSK2           | 9,883  | VRK1             | 3,923 | DRAK2 (STK17B)  | 1,980 |                 |
| TBK1            | 106,427 | DAPK3           | 9,822  | AMPK (A2/B2/G3)  | 3,912 | CLK3            | 1,958 |                 |
| PKC alpha       | 102,845 | AURORA C        | 9,740  | RSK4             | 3,846 | MRCK alpha      | 1,936 |                 |
| NEK2            | 99,876  | CAMK2 gamma     | 9,676  | BRAF             | 3,826 | GRK6            | 1,928 |                 |
| MLK1            | 98,444  | VRK2            | 9,550  | CDK2/CyclinA1    | 3,817 | IKK alpha       | 1,852 |                 |
| PKC eta         | 95,137  | CHK1            | 9,447  | BRSK1            | 3,800 | NEK8            | 1,844 |                 |
| PKC theta       | 82,115  | STK33           | 9,190  | CASK             | 3,793 | PCTK3 (CDK18)   | 1,812 |                 |
| PKC iota        | 75,819  | ALK1            | 8,852  | EEF2K            | 3,739 | DYRK4           | 1,805 |                 |
| AURORA B        | 72,966  | PHKG2           | 8,761  | MST4             | 3,722 | PFTK1(CDK14)Cyc | 1,776 |                 |
| CAMK2 beta      | 71,807  | CAMK1 beta      | 8,751  | SNRK             | 3,679 | SIK             | 1,724 |                 |
| NEK6            | 67,524  | CDK5/p25        | 8,524  | CAMK1            | 3,657 | MEKK1           | 1,691 |                 |
| ULK1            | 65,909  | MSK1            | 8,483  | MARK3            | 3,624 | PEAK1           | 1,680 |                 |
| ULK2            | 64,661  | PRKG1           | 8,362  | PCTK2 (CDK17)    | 3,596 | PKC nu          | 1,680 |                 |
| PKC delta       | 59,375  | PRKG2           | 8,340  | CDK5/p35         | 3,590 | PDHK1           | 1,668 |                 |
| CK1 alpha 1     | 58,763  | TAOK1           | 8,257  | NLK              | 3,584 | MST3            | 1,645 |                 |
| CDC7/DBF4       | 55,210  | TGFBFR2         | 8,047  | MYLK3            | 3,583 | NDR             | 1,637 |                 |
| CK1 gamma 3     | 54,848  | NIM1            | 7,945  | CAMK1 delta      | 3,539 | SRPK2           | 1,632 |                 |
| PKAc beta       | 51,041  | PAK7            | 7,916  | MLCK             | 3,528 | RAF1(EE)        | 1,607 |                 |
| CK1 alpha 1L    | 45,567  | MEKK3           | 7,799  | RIPK1            | 3,521 | CDK2/CyclinO    | 1,586 |                 |
| CK1 gamma 2     | 40,800  | IKK beta        | 7,760  | STK3             | 3,499 | p38 gamma       | 1,576 |                 |
| SGK3            | 40,181  | RSK2            | 7,721  | MYLK4            | 3,498 | ERK2            | 1,570 |                 |
| MST1            | 38,378  | p70S6K          | 7,590  | HIPK4            | 3,469 | LATS2           | 1,566 |                 |
| TTBK2           | 35,044  | CAMKK2          | 7,398  | CLK2             | 3,416 | GRK7            | 1,543 |                 |
| PKAc alpha      | 34,771  | TLK2            | 7,236  | CAMK1 gamma      | 3,353 | MEK5            | 1,504 |                 |
| TLK1            | 34,750  | AMPK (A2/B2/G1) | 7,235  | BRSK2            | 3,331 | JNK1            | 1,491 |                 |
| TTBK1           | 34,299  | DAPK1           | 7,166  | CDK2/CyclinE1    | 3,316 | HUNK            | 1,471 |                 |
| EIF2AK3         | 32,945  | AMPK (A1/B2/G1) | 6,987  | MAPKAPK2         | 3,270 | EIF2AK2         | 1,429 |                 |
| PKC epsilon     | 32,376  | PKD2            | 6,956  | AKT3             | 3,269 | p70S6Kb         | 1,419 |                 |
| KDR             | 32,100  | AKT1            | 6,708  | MAK              | 3,166 | MEK6            | 1,362 |                 |
| GCK             | 28,599  | NIK             | 6,688  | PIM1             | 3,137 | PLK2            | 1,312 |                 |
| NEK9            | 27,568  | WNK1            | 6,613  | FASTK            | 3,133 | CDK6/CyclinD1   | 1,283 |                 |
| PKAc gamma      | 27,509  | MAPKAPK5        | 6,561  | BUB1B            | 3,121 | GSK3 beta       | 1,281 |                 |
| PAK1            | 27,316  | MARK4           | 6,474  | COT              | 3,092 | KSR1            | 1,192 |                 |
| AMPK (A1/B1/G2) | 24,259  | CDK1/CyclinA2   | 6,408  | CDK9/CyclinK     | 3,040 | MNK2            | 1,186 |                 |
| CK1 delta       | 23,576  | MYO3 alpha      | 6,379  | SRPK1            | 3,030 | GRK3            | 1,154 |                 |
| YSK4            | 23,510  | CAMK2 delta     | 6,359  | ERN1 (IRE1)      | 3,002 | PDHK4           | 1,153 |                 |
| ULK3            | 21,762  | KHS1            | 6,222  | MAPKAPK3         | 2,979 | SIK3            | 1,123 |                 |
| NEK5            | 20,936  | CDK1/CyclinA1   | 5,961  | p38 alpha        | 2,945 | IKK epsilon     | 1,109 |                 |
| TAOK3           | 20,457  | ALK2            | 5,902  | TXK              | 2,945 | NDR2 (STK38L)   | 1,104 |                 |
| EIF2AK4 (GCN2)  | 17,969  | ALK4            | 5,897  | RIPK5            | 2,930 | DMPK            | 1,103 |                 |
| DCAMKL2         | 17,207  | AKT2            | 5,830  | ROCK1            | 2,884 | MSK2            | 1,103 |                 |
| CK1 epsilon     | 16,577  | HGK             | 5,774  | PAK6             | 2,861 | Haspin (GSG2)   | 1,096 |                 |
| CDK9/CyclinT2   | 15,002  | PDHK3           | 5,753  | DYRK3            | 2,847 | PLK3            | 1,057 |                 |
| RIPK3           | 14,926  | AMPK (A2/B1/G3) | 5,687  | HIPK2            | 2,842 | PAK2            | 1,036 |                 |
| HPK1            | 14,096  | p38 beta        | 5,478  | PIM3             | 2,757 | PDHK2           | 1,036 |                 |
| STK32B(YANK2)   | 13,961  | TAOK2           | 5,418  | SBK1             | 2,745 | ERK1            | 1,033 |                 |
| AURORA A        | 13,527  | DRAK1 (STK17A)  | 5,371  | NUAK2            | 2,665 | MEK1            | 1,031 |                 |
| AMPK (A1/B1/G3) | 13,405  | GRK1            | 5,206  | CDK7/CyclinH1/MN | 2,662 | SGK1            | 1,025 |                 |
| DCAMKL1         | 13,380  | ALK3 (BMPR1A)   | 5,101  | PIM2             | 2,623 | MEK2            | 1,009 |                 |
| MYLK2           | 13,209  | CHK2            | 5,081  | DYRK1a           | 2,620 | CDK3/CyclinE1   | 1,000 |                 |
| PLK4            | 12,525  | AMPK (A1/B2/G3) | 5,073  | p38 delta        | 2,614 | TESK2           | 973   |                 |
| DYRK2           | 12,429  | PAK4-GTP        | 5,035  | PASK             | 2,590 | TGFBFR1 (ALK5)  | 959   |                 |
| TTK             | 12,279  | HIPK1           | 5,000  | SGK2             | 2,588 | NEK1            | 949   |                 |
| BMPR2           | 11,689  | CLK4            | 4,997  | TSSK1B           | 2,578 | LOK             | 910   |                 |
| CAMK2 alpha     | 11,654  | DAPK2           | 4,974  | MLK3             | 2,548 | IRAK2           | 899   |                 |
| NEK11           | 11,639  | TNIK            | 4,961  | MELK             | 2,533 | LRRK2           | 899   |                 |
| CK2 alpha 1     | 11,509  | ERN2 (IRE2)     | 4,930  | PHKG1            | 2,490 | PKN3/PRK3       | 892   |                 |
| RSK3            | 11,244  | ASK1            | 4,850  | GRK5             | 2,471 | JNK3            | 860   |                 |
| ROCK2           | 11,187  | IRAK4           | 4,848  | PLK1             | 2,467 | GLK             | 818   |                 |
| STK39 (STLK3)   | 10,975  | PKC mu          | 4,839  | GRK2             | 2,427 | PRKX            | 802   |                 |
| AMPK (A2/B1/G2) | 10,972  | CDK6/CyclinD3   | 4,781  | RIPK2            | 2,371 | LATS1           | 797   |                 |
| AMPK (A2/B1/G1) | 10,963  | SLK             | 4,666  | QIK              | 2,354 | STK36           | 794   |                 |
| PKN2/PRK2       | 10,961  | TOPK            | 4,627  | EIF2AK1 (HRI)    | 2,353 | STK19           | 793   |                 |
| RSK1            | 10,918  | CAMK4           | 4,553  | MINK1            | 2,318 | JNK2            | 751   |                 |
| NEK3            | 10,845  | MYO3 beta       | 4,527  | MSSK1            | 2,248 | CDK4/CyclinD1   | 745   |                 |
| AMPK (A2/B2/G2) | 10,827  | CDK2/CyclinA2   | 4,455  | ICK              | 2,241 | STK32C (YANK3)  | 685   |                 |
| AMPK (A1/B1/G1) | 10,681  | MARK2           | 4,441  | KSR2             | 2,236 | PKN1/PRK1       | 51    |                 |
| MLK2            | 10,481  | NEK4            | 4,413  | PCTK1(CDK16)Cyc  | 2,226 |                 |       |                 |
| SOK1            | 10,460  | MRCK beta       | 4,372  | LIMK1            | 2,221 |                 |       |                 |

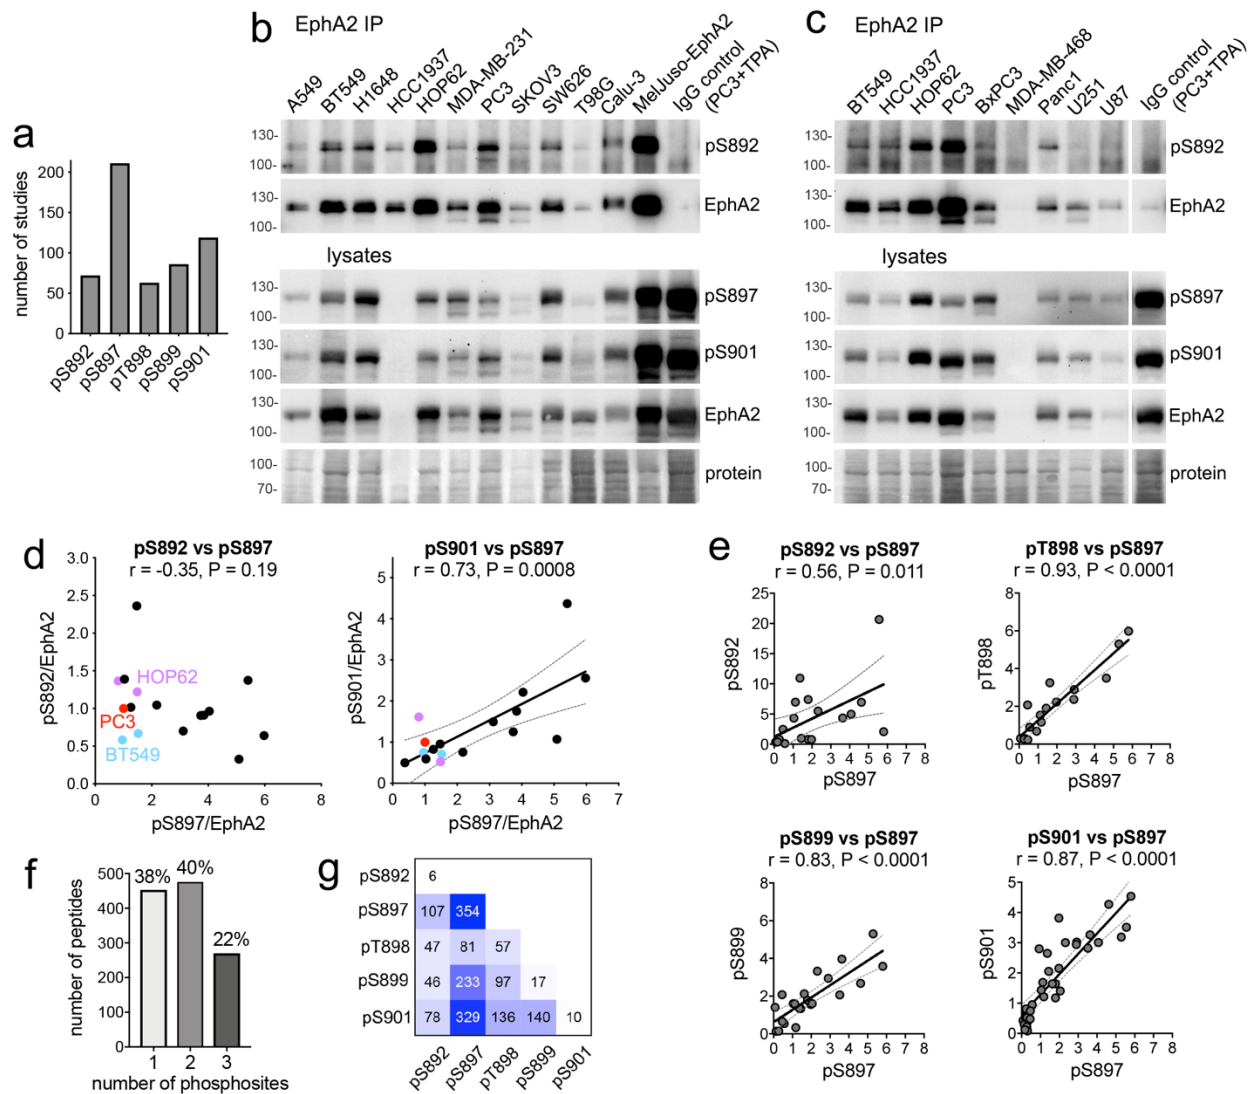

**Supplementary Figure 1. EphA2 is phosphorylated on multiple serine/threonine residues in the kinase-SAM linker in cancer cell lines.** (a) Number of studies identifying the indicated phosphosites. The higher number of studies identifying phosphorylated S897 may be due to the many mass spectrometry experiments in which peptides were purified for analysis using phospho-AKT substrate antibodies, which recognize the phosphorylated S897 motif. Data are from the 2021 PhosphoSite database (phosphosite.org). (b, c) Cancer cell lines were screened in two experiments for EphA2 phosphorylation on S892, S897 and S901. EphA2 immunoprecipitates were probed with an antibody specific for pS892 and reprobed for EphA2. Lysates were probed in separate blots with antibodies specific for pS897 or pS901 and reprobed for EphA2. Amido black staining shows relative protein loading in different lanes. The white vertical line in c indicates removal of an irrelevant lane. Molecular weight markers, in kDa, are indicated. (d) Correlation of pS892 or pS901 versus pS897, normalized to total EphA2 levels, from the blots in b and c. The values in each blot were normalized to the value for PC3 cells (in red) measured in the same blot. Duplicate measurements for BT549 cells are shown in blue and for HOP62 cells in purple. (e) The number of peptides containing each phosphosite, identified by mass spectrometry in lung and breast cancer cell lines, were normalized to the number of peptides containing the same phosphorylation site in a reference pool of 16 non-small cell lung cancer cell lines. The original data used for these analyses are from Supplemental Table S2 in ref.<sup>1</sup>. In d and e, the Pearson correlation coefficient,  $r$ , and the P value (two-tailed) for the significance of the correlation are shown. The best fit interpolation line (black line) and 95% confidence interval (grey dotted lines) are shown in the panels with significant correlation. (f) Sixty-two % of the phosphopeptides

from the EphA2 linker contain multiple phosphosites. Data are from the 2014 PhosphoSite database. **(g)** Different representation of the data in f, showing the number of peptides in which the indicated phosphosites were detected together. Prism software (GraphPad) was used to generate graphs and for statistical analysis. Source data for b, c, d are provided in the Source Data file.

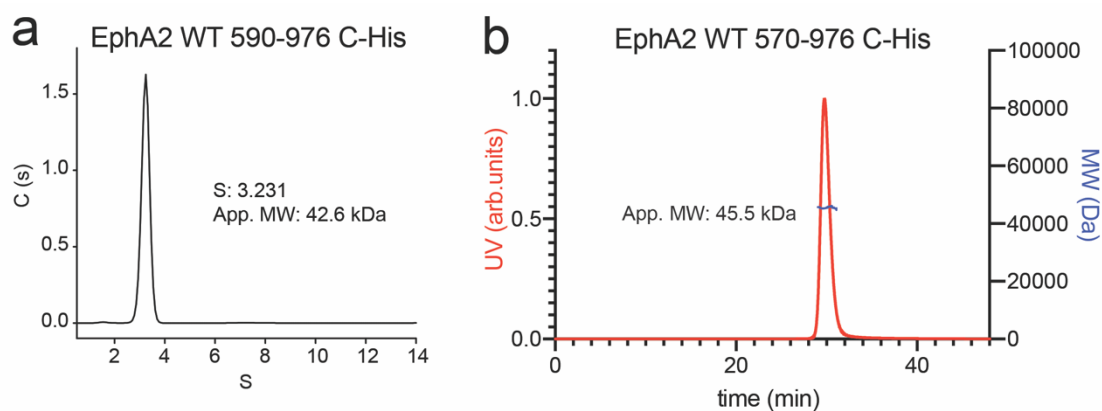

**Supplementary Figure 2. The EphA2 intracellular region is monomeric in solution.** **(a)** Sedimentation velocity measured by analytical ultracentrifugation for the EphA2 WT intracellular region (residues D590-1976) used for crystallization, shows that it is a monomer with an apparent molecular weight of 42.6 kDa, which closely matches the expected molecular weight of 43.9 kDa. **(b)** Size-exclusion chromatography coupled to multi-angle light scattering (SEC-MALS) for the EphA2 WT intracellular region (residues S570-1976) used in SEC-SAXS and HDX-MS experiments, shows that it is a monomer with an apparent molecular weight of 45.5 kDa, closely matching the expected molecular weight of 47.2 kDa. Source data for a, b are provided in the Source Data file.

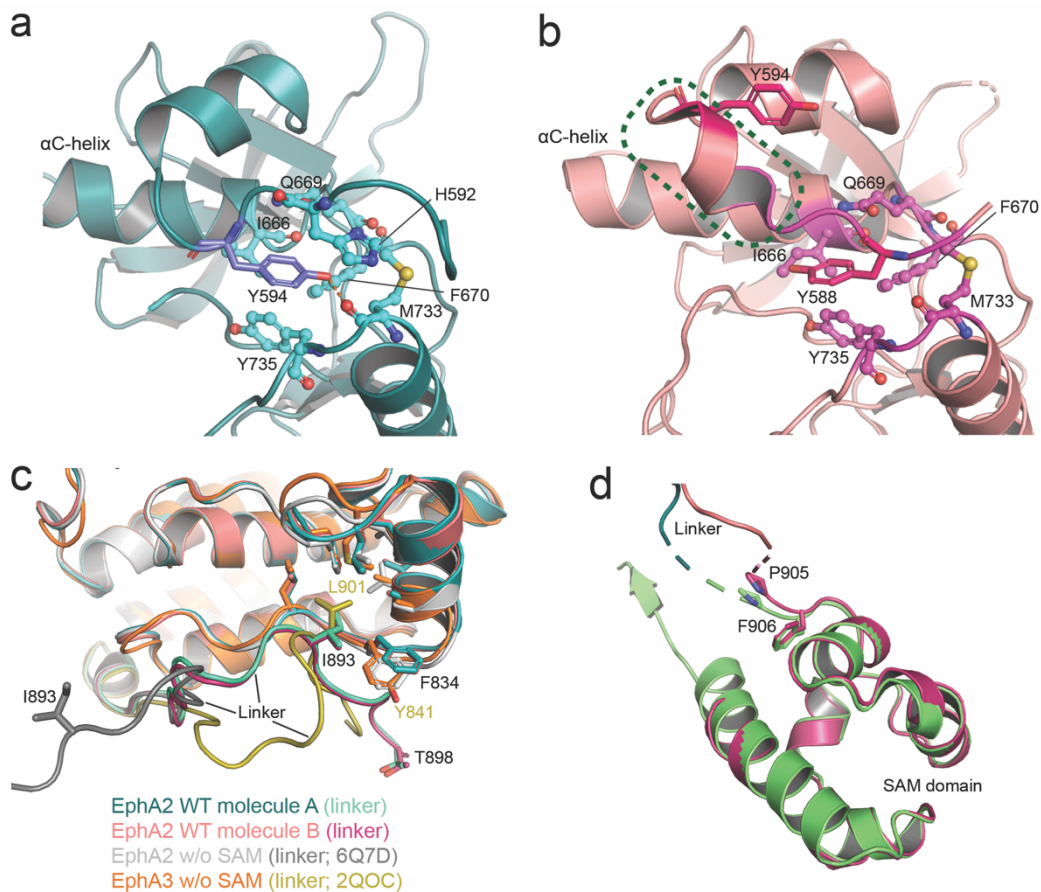

**Supplementary Figure 3. Molecular details of the interaction between the non-phosphorylated EphA2 juxtamembrane segment and the kinase domain.** (a) In our structure (PDB 7KJA [<http://doi.org/10.2210/pdb7KJA/pdb>]), the EphA2 juxtamembrane segment (molecule A shown) forms a short, 2-turn helix comprising residues P597–F604. Y594 is surrounded by a hydrophobic pocket lined by I666 and F670 at the end of the  $\alpha$ C-helix and residues M733 and Y735, and additionally forms a hydrogen bond with the backbone of M733 (dashed line). (b) In a previous structure of the EphA2 juxtamembrane segment and kinase domain (residues K586–I875; PDB 5EK7<sup>2</sup> [<http://doi.org/10.2210/pdb5EK7/pdb>]), Y588 rather than Y594 binds to the same hydrophobic pocket. In this previous structure, the juxtamembrane segment forms an additional short helix (outlined by a dotted green line) leading to the observed differences. (c) Superposition of molecules A and B of our EphA2 WT structure (colors as in Fig. 1), an EphA2 kinase domain structure (residues A599–P896; PDB 6Q7D [<http://doi.org/10.2210/pdb6Q7D/pdb>], grey) and an EphA3 kinase domain (PDB 2QOC<sup>3</sup> [<http://doi.org/10.2210/pdb2QOC/pdb>], orange). Linker residues I875–T898 of the two molecules in our EphA2 structure have the same conformation, which differs from the linker conformation of EphA2 without the SAM domain, whereas some features (N-terminal part of the linker and interactions of the I893 hydrophobic residue) resemble the linker conformation of EphA3 without the SAM domain. Kinase domain residues forming a hydrophobic pocket that accommodates EphA2 I893 or EphA3 L901 are shown as sticks. (d) The two molecules in our EphA2 WT structure were superposed based on their SAM domains. The first residue of the SAM domain (F906) has the same position in the two EphA2 molecules, whereas differences are observed for the first residue after the missing portion of the linker (P905). Colors as in Fig. 1.



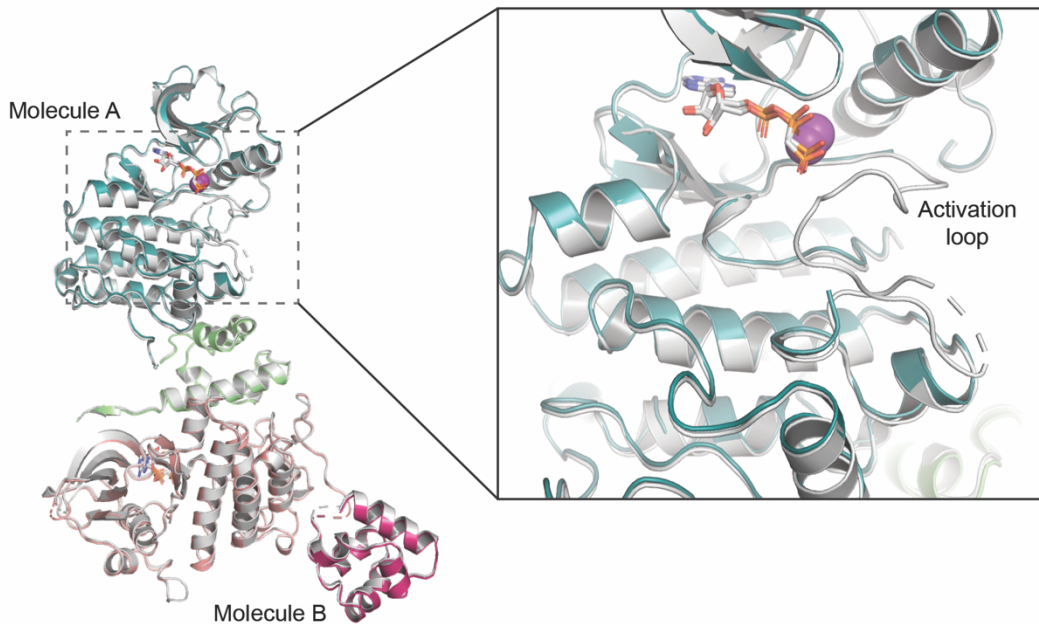

**Supplementary Figure 4. Crystal structure of the intracellular region of the EphA2 S901E mutant.** Superposition of the structures of the intracellular regions of EphA2 WT (colored as in Fig. 1) and the S901E mutant (grey, resolution 2.3 Å). The two structures are almost identical, with an overall RMSD calculated by aligning all C $\alpha$  atoms of 0.48 Å. The RMSD obtained by aligning the individual molecules is 0.37 Å for molecule A and 0.34 Å for molecule B. A notable difference between the two structures is that most of the activation loop (residues L760-I779) is undefined in the EphA2 WT structure (the undefined region of the loop is not shown), whereas only a small portion of the activation loop (T773-G777) is undefined in molecule A of the EphA2 S901E mutant structure (indicated by a dashed line). This difference is possibly due to the slightly smaller unit cell dimensions and tighter crystal packing of the S901E mutant. The inset shows an enlargement of the indicated portion of the structures in a slightly tilted orientation. AMPPCP is shown as sticks, Mg<sup>2+</sup>-ions as purple spheres.



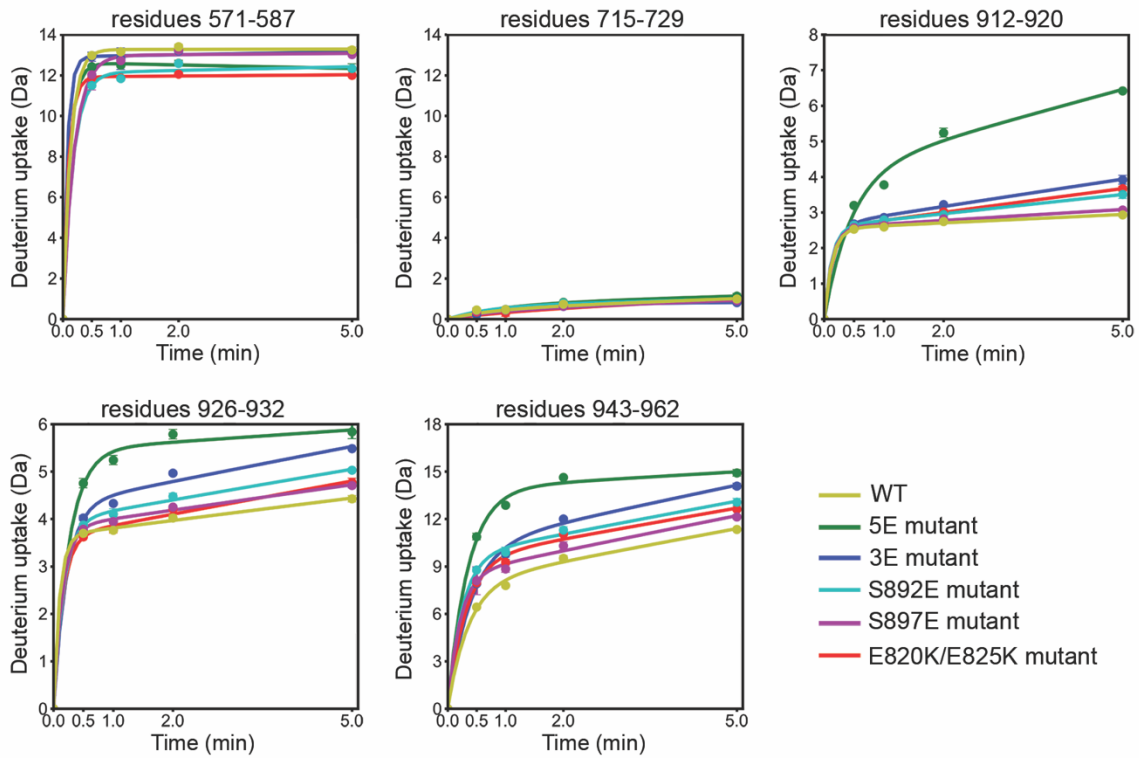

**Supplementary Figure 5. Time course of hydrogen-deuterium exchange for key peptides.** Deuterium uptake in the indicated peptides is plotted against time. The Y-axes are scaled to the maximum theoretically possible deuterium uptake for each peptide. Colors denote different mutants, as indicated. Averages +/- SEM from 3 technical replicates are shown. Source data are provided in the Source Data file.

**a** EphA2 WT

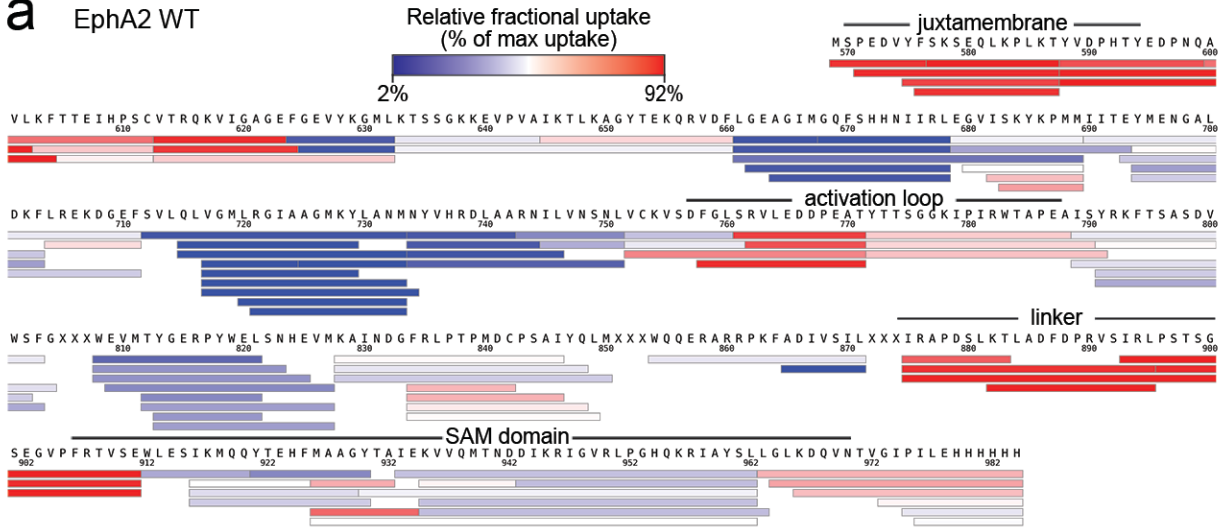

**b** EphA2 5E mutant

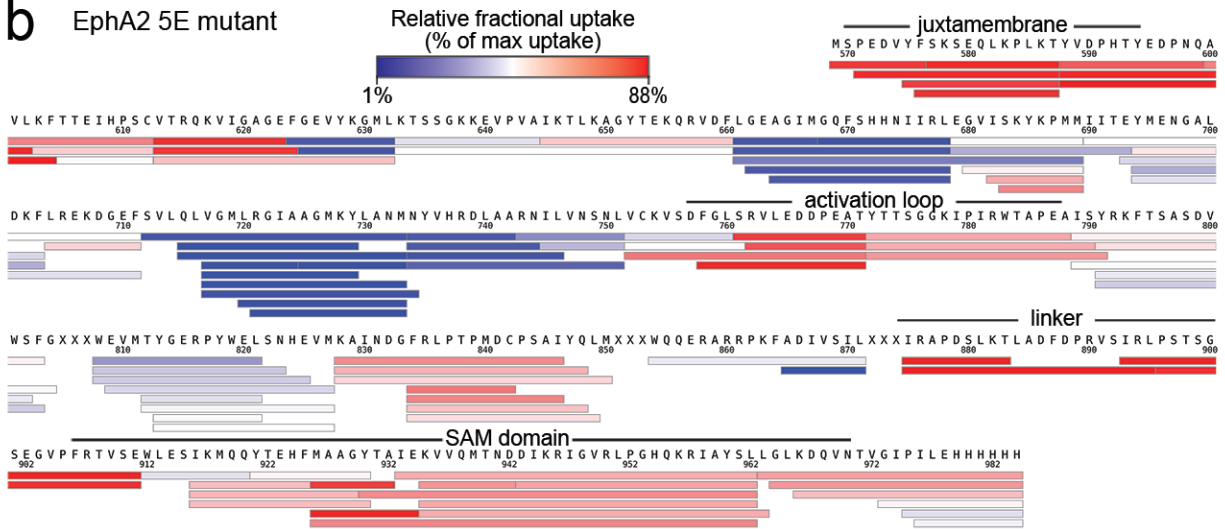

**c** EphA2 3E mutant

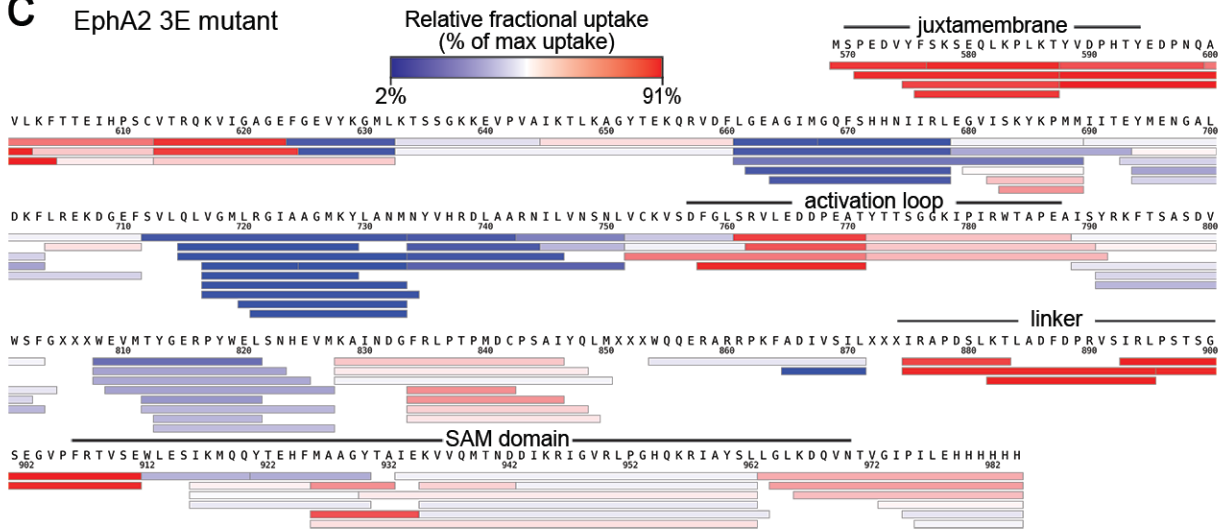

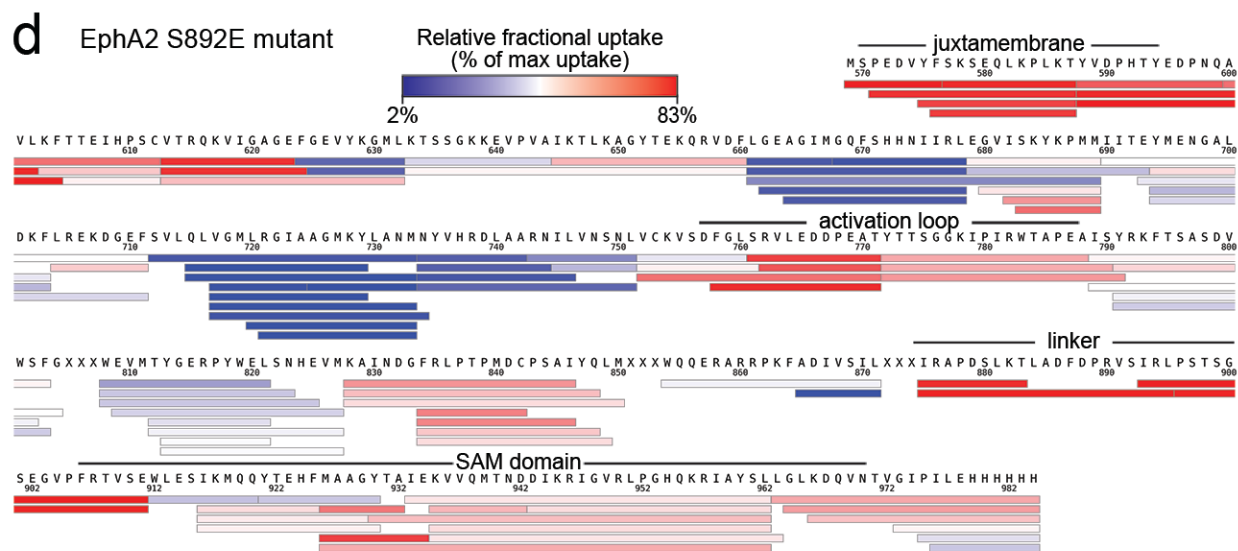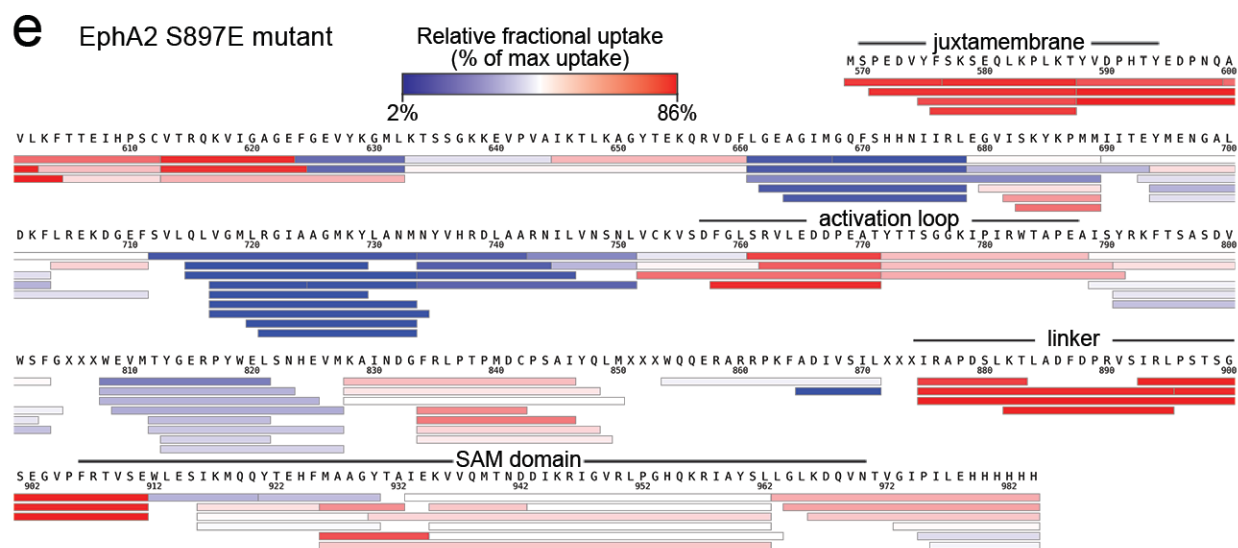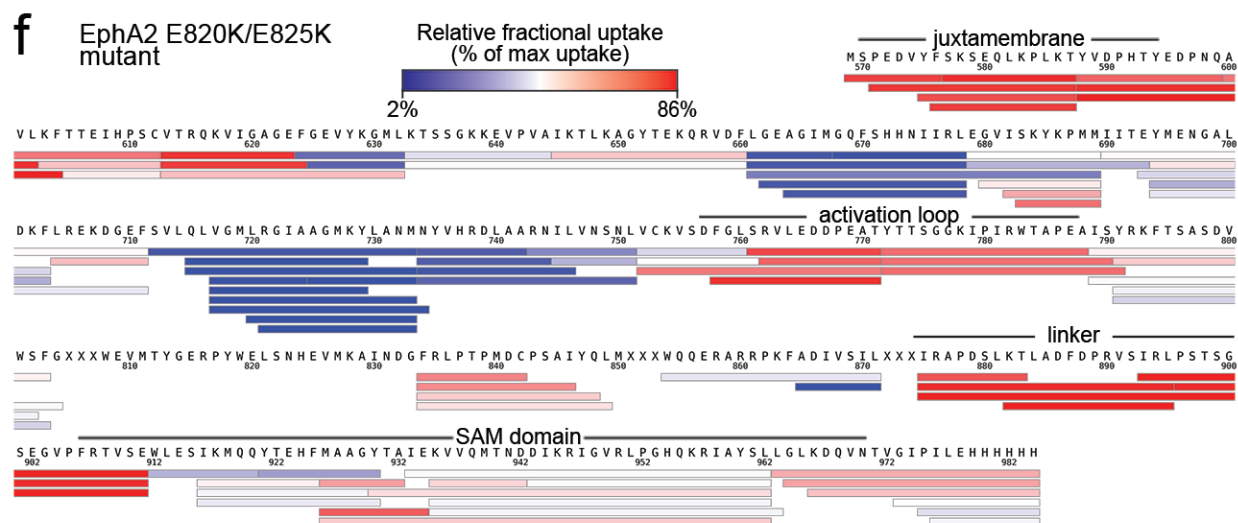

**Supplementary Figure 6. Coverage plots from HDX-MS experiments and relative fractional uptake after 0.5 min deuterium exposure. (a) EphA2 WT (b) 5E mutant (c) 3E mutant (d) S892E mutant (e)**

S897E mutant (f) E820K/E825K mutant. In six experiments, we assigned 111 peptides covering 97.8% of the EphA2 WT sequence with 4.0 average redundancy. Data represent averages from n = 3 successful technical replicates for each mutant. Source data are provided in the Source Data file.

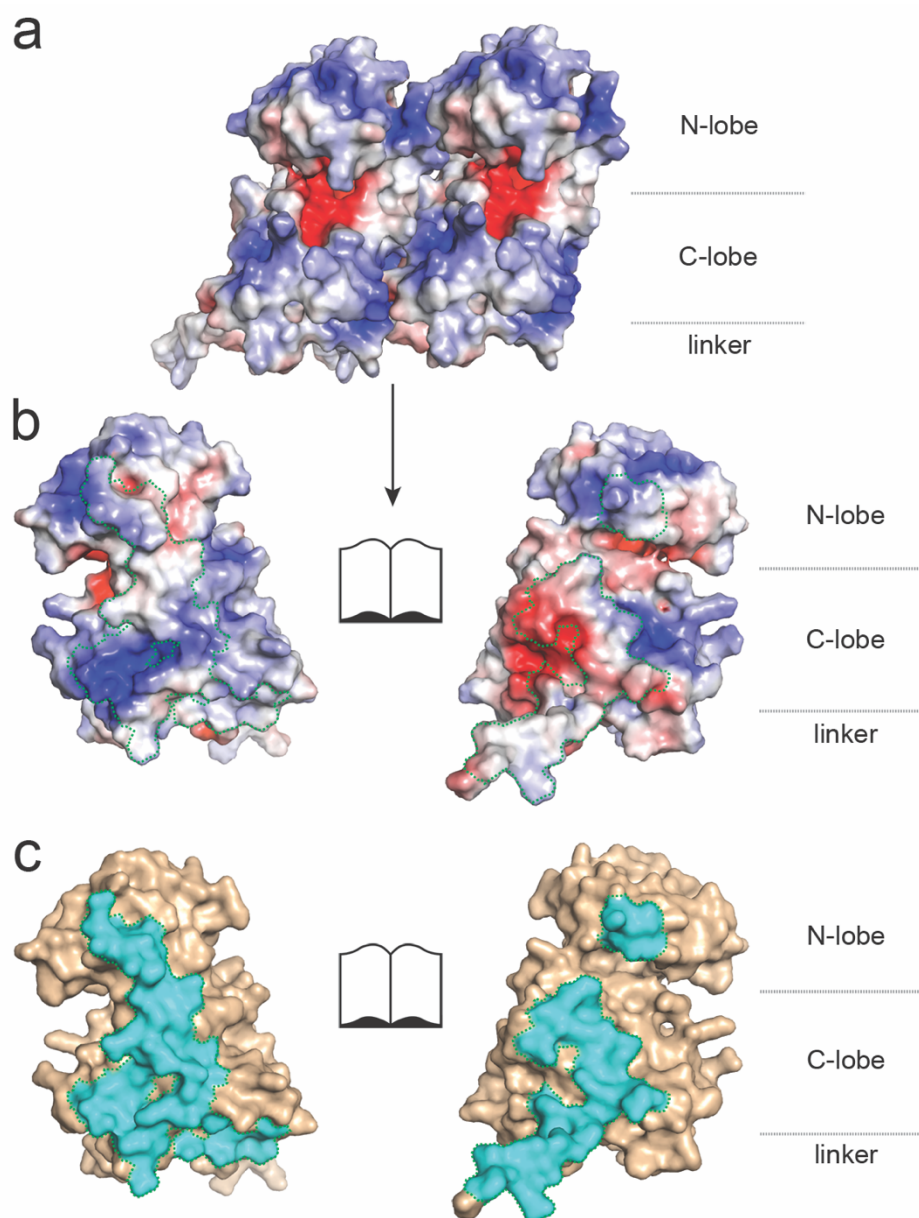

**Supplementary Figure 7. Putative EphA2 dimer.** (a) Crystallographic EphA2 kinase domain dimer (PDB 6FNG [<http://doi.org/10.2210/pdb6FNG/pdb>])<sup>4</sup> with electrostatic surface. (b) Open book view of the dimer shown in A. The dimer interfaces are outlined by green dotted lines. (c) View as in B, both molecules are colored in wheat with dimer interfaces shown in cyan.

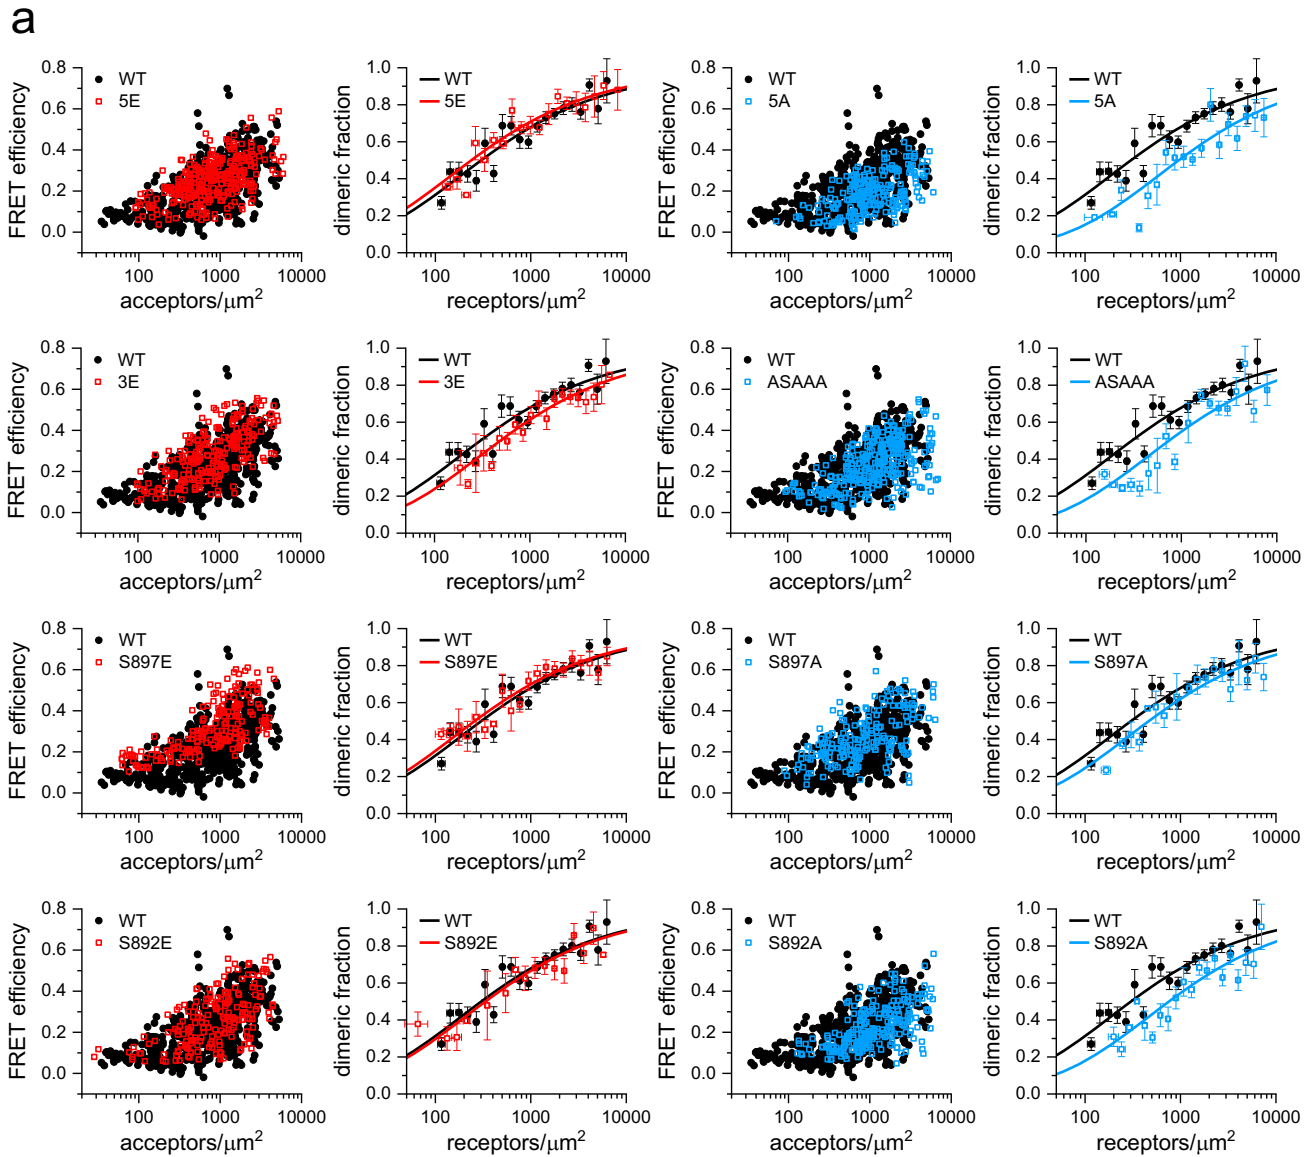

**b**

| EphA2 | $K_{\text{diss}} \text{ (rec}/\mu\text{m}^2\text{)}$ |
|-------|------------------------------------------------------|
| WT    | $302 \pm 68$                                         |
| 5E    | $238 \pm 73^*$                                       |
| 3E    | $409 \pm 144^*$                                      |
| S897E | $259 \pm 63$                                         |
| S892E | $334 \pm 154$                                        |
| 5A    | $958 \pm 347^*$                                      |
| ASAAA | $698 \pm 209^*$                                      |
| S897A | $465 \pm 149^*$                                      |
| S892A | $756 \pm 247^*$                                      |

**Supplementary Figure 8. FSI-FRET analysis of dimerization for EphA2 kinase-SAM linker mutants.**

(a) FRET efficiencies, measured in individual cells, are shown as a function of EphA2-EYFP (acceptor) concentrations in the first and third columns. The data for the EphA2 phosphomimetic mutants (red symbols) and non-phosphorylatable mutants (blue symbols) are compared to EphA2 WT data (black symbols; from ref.<sup>5</sup>). These FRET efficiencies have been corrected as described<sup>6</sup> for “proximity FRET”, which arises due to random proximity of donors and acceptors in the two-dimensional plasma membrane.

Best fit dimerization curves were obtained by fitting the FRET data with equation (2) in the Methods and are shown as solid lines in the second and fourth columns. The experimental data were binned and are shown as averages and standard errors. The number of data points,  $N$ , is as follows: WT ( $N=670$ ), 5E ( $N=314$ ), 3E ( $N=235$ ), S897E ( $N=191$ ), S892E ( $N=188$ ), 5A (S892A/S897A/T898A/S899A/S901A;  $N=234$ ), ASAAA (S892A/T898A/S899A/S901A;  $N=317$ ), S897A ( $N=196$ ), and S892A ( $N=241$ ). **(b)** Best-fit parameters.  $K_{diss}$  is the two-dimensional dissociation constant. The errors are 68% confidence intervals from the fit. Statistical significance ( $P < 0.05$ ) for comparison with EphA2 WT was determined by one-way ANOVA followed by the Tukey's multiple comparisons test and is indicated with an asterisk (the exact  $P$  values are 0.057 for EphA2 S897E, 0.365 for EphA2 S892E and  $P < 0.0001$  for all other EphA2 mutants).  $\tilde{E}$ : Intrinsic FRET;  $d$ : average distance between the fluorescent proteins in the EphA2 dimers. See Methods for details. Source data are provided in the Source Data file.

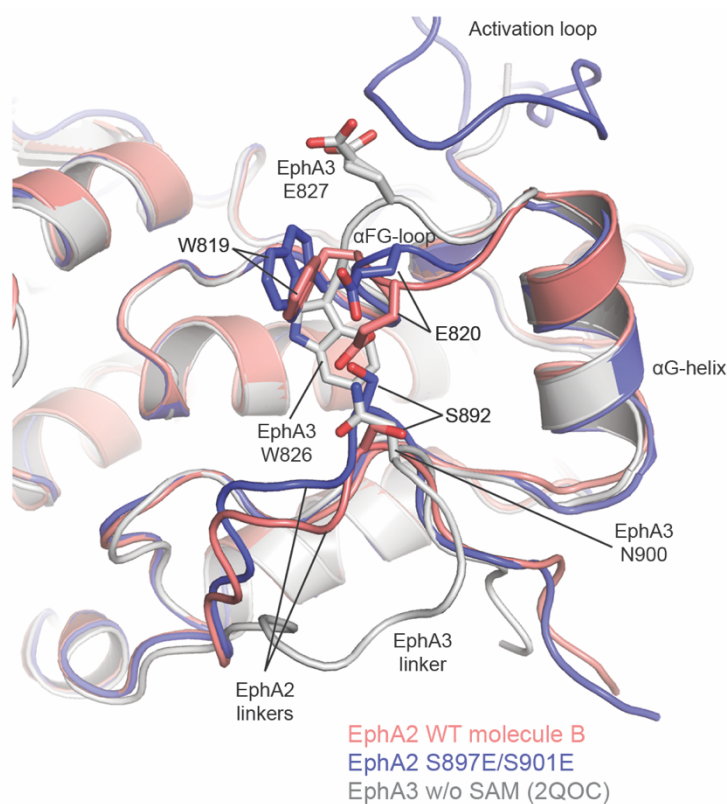

**Supplementary Figure 9. EphA2 W819 and E820 as sensors of kinase-SAM linker phosphorylation.**

Overlay of the EphA2 WT kinase-SAM domain structure (molecule B), the EphA2 S897E/S901E mutant kinase-SAM domain structure, and the EphA3 kinase-linker structure (PDB 2QOC [<http://doi.org/10.2210/pdb2QOC/pdb>]); ref. <sup>3</sup>. In EphA2, E820 in the  $\alpha$ FG-loop is positioned just above S892 and may act as a sensor for linker phosphorylation. The EphA2  $\alpha$ FG-loop, including W819, is part of an allosteric network that relays information about linker phosphorylation to the activation loop. The E827 sidechain is observed in two different conformations in the EphA3 crystal structure.

## SUPPLEMENTARY REFERENCES

1. Klammer, M. et al. Phosphosignature predicts dasatinib response in non-small cell lung cancer. *Mol Cell Proteomics* **11**, 651-68 (2012).
2. Wei, Q. et al. A new autoinhibited kinase conformation reveals a salt-bridge switch in kinase activation. *Sci Rep* **6**, 28437 (2016).
3. Davis, T.L. et al. Autoregulation by the juxtamembrane region of the human ephrin receptor tyrosine kinase A3 (EphA3). *Structure* **16**, 873-84 (2008).
4. Troster, A. et al. NVP-BHG712: Effects of Regioisomers on the Affinity and Selectivity toward the EPHrin Family. *ChemMedChem* **13**, 1629-1633 (2018).
5. Gomez-Soler, M. et al. Engineering nanomolar peptide ligands that differentially modulate EphA2 receptor signaling. *J Biol Chem* **294**, 8791-8805 (2019).
6. King, C., Raicu, V. & Hristova, K. Understanding the FRET signatures of interacting membrane proteins. *J Biol Chem* **292**, 5291-5310 (2017).
